# Supplementary material for: Defence Is a Priority in Female Juveniles and Adults of Taxus baccata L.
Source: MDPI journal article supplement (doi:10.3390/f12070844), 2021-06-26
Supplement: s1 [file s1]

Archive with 2 entries (2 files):
- forests-1184206-supplementary- Figures.pdf
- Table S1 change min.pdf
