# Supplementary material for: Defence Is a Priority in Female Juveniles and Adults of Taxus baccata L.
Source: MDPI journal article supplement (doi:10.3390/f12070844), 2021-06-26
Supplement: s1 [file s1]

Table S1. *Taxus baccata* L. full factorial ANOVA results for pot experiment and field studies for nitrogen, carbon, C/N ratio, total nonstructural carbohydrates (TNC), starch and total phenolic compounds (TPhC).

|                  | Source                   | Nparm | DF | Nitrogen |          |                  | Carbon   |         |                  | C/N      |          |                  | TNC      |         |                  | Starch   |          |                  | Phenols  |         |                  |
|------------------|--------------------------|-------|----|----------|----------|------------------|----------|---------|------------------|----------|----------|------------------|----------|---------|------------------|----------|----------|------------------|----------|---------|------------------|
|                  |                          |       |    | DFDen    | F Ratio  | Prob > F         | DFDen    | F Ratio | Prob > F         | DFDen    | F Ratio  | Prob > F         | DFDen    | F Ratio | Prob > F         | DFDen    | F Ratio  | Prob > F         | DFDen    | F Ratio | Prob > F         |
| Pot experiment   | Year                     | 1     | 1  | 2.389394 | 8.0246   | 0.086            | 1.759342 | 7.5139  | 0.1276           | 2.58485  | 6.5766   | 0.0962           | 2.036319 | 0.039   | 0.8614           | 4.129035 | 1.5596   | 0.2779           | 11.74193 | 0.4202  | 0.5293           |
|                  | Season                   | 3     | 3  | 163.9359 | 31.882   | <b>&lt;.0001</b> | 149.1165 | 13.5465 | <b>&lt;.0001</b> | 165.6764 | 19.7514  | <b>&lt;.0001</b> | 141.1253 | 16.7666 | <b>&lt;.0001</b> | 165.9932 | 233.3175 | <b>&lt;.0001</b> | 165.022  | 48.9488 | <b>&lt;.0001</b> |
|                  | Year*Season              | 3     | 3  | 160.3439 | 17.9457  | <b>&lt;.0001</b> | 136.6769 | 1.5232  | 0.2113           | 162.9413 | 11.6726  | <b>&lt;.0001</b> | 136.6727 | 6.1285  | <b>0.0006</b>    | 166.4301 | 3.9169   | <b>0.0098</b>    | 165.3943 | 3.0023  | <b>0.0321</b>    |
|                  | <b>Sex</b>               | 1     | 1  | 117.336  | 0.218    | 0.6414           | 147.6419 | 0.6061  | 0.4375           | 122.7341 | 0.0083   | 0.9276           | 145.1238 | 8.9515  | <b>0.0033</b>    | 131.3219 | 1.8266   | 0.1789           | 145.8388 | 9.2253  | <b>0.0028</b>    |
|                  | <b>Year*Sex</b>          | 1     | 1  | 120.2935 | 0.0072   | 0.9325           | 130.9086 | 0.0181  | 0.8931           | 126.1391 | 0.1818   | 0.6705           | 141.6145 | 3.3831  | 0.068            | 140.7991 | 0.5416   | 0.463            | 158.0574 | 0.1413  | 0.7075           |
|                  | <b>Season*Sex</b>        | 3     | 3  | 183.0897 | 1.0849   | 0.3568           | 100.577  | 2.7091  | <b>0.0491</b>    | 186.2636 | 0.8858   | 0.4496           | 148.9429 | 0.9833  | 0.4024           | 191.0165 | 3.6413   | <b>0.0138</b>    | 184.407  | 4.774   | <b>0.0031</b>    |
|                  | Fertilization            | 1     | 1  | 179.0066 | 506.3196 | <b>&lt;.0001</b> | 185.0941 | 4.9744  | <b>0.0269</b>    | 183.9018 | 330.3575 | <b>&lt;.0001</b> | 163.6566 | 0.0186  | 0.8916           | 185.475  | 0.0005   | 0.982            | 176.4746 | 5.5887  | <b>0.0192</b>    |
|                  | Year*Fertilization       | 1     | 1  | 177.2057 | 12.7748  | <b>0.0005</b>    | 177.3871 | 0.2694  | 0.6044           | 182.586  | 18.1344  | <b>&lt;.0001</b> | 162.5948 | 1.6603  | 0.1994           | 185.1508 | 2.0462   | 0.1543           | 176.0146 | 0.0694  | 0.7925           |
|                  | Season*Fertilization     | 3     | 3  | 161.9042 | 0.9568   | 0.4147           | 166.7652 | 0.3796  | 0.7679           | 166.0462 | 2.0592   | 0.1076           | 150.7107 | 2.2916  | 0.0805           | 168.4343 | 3.5045   | <b>0.0167</b>    | 164.0123 | 0.5954  | 0.6189           |
|                  | <b>Sex*Fertilization</b> | 1     | 1  | 154.3281 | 0.6009   | 0.4394           | 157.2388 | 0.0098  | 0.9214           | 161.6579 | 0.0025   | 0.96             | 142.7102 | 0.0918  | 0.7623           | 161.8615 | 0.2748   | 0.6009           | 155.0077 | 0.2392  | 0.6255           |
|                  | Needle age               | 1     | 1  | 169.6638 | 9.2365   | <b>0.0027</b>    | 177.9084 | 0.0551  | 0.8146           | 164.8427 | 15.4945  | <b>0.0001</b>    | 141.8381 | 7.6274  | <b>0.0065</b>    | 164.8658 | 67.2943  | <b>&lt;.0001</b> | 165.5301 | 50.7891 | <b>&lt;.0001</b> |
|                  | Year*Needle age          | 1     | 1  | 169.6638 | 0.1213   | 0.728            | 177.9084 | 0.0059  | 0.939            | 164.8478 | 0.1056   | 0.7457           | 141.8363 | 19.0737 | <b>&lt;.0001</b> | 164.8658 | 0.0302   | 0.8621           | 165.5301 | 5.7614  | <b>0.0175</b>    |
|                  | Season*Needle age        | 3     | 3  | 169.6991 | 8.958    | <b>&lt;.0001</b> | 177.9679 | 0.645   | 0.5871           | 164.8781 | 12.6655  | <b>&lt;.0001</b> | 141.7609 | 16.282  | <b>&lt;.0001</b> | 164.8926 | 15.7294  | <b>&lt;.0001</b> | 165.1338 | 10.1117 | <b>&lt;.0001</b> |
|                  | <b>Sex*Needle age</b>    | 1     | 1  | 169.6613 | 0.0575   | 0.8108           | 177.9109 | 2.7901  | 0.0966           | 164.8414 | 2.7247   | 0.1007           | 141.6882 | 0.2653  | 0.6073           | 164.856  | 1.7767   | 0.1844           | 165.4988 | 1.1971  | 0.2755           |
|                  | Fertilization*Needle age | 1     | 1  | 169.6613 | 4.0551   | <b>0.0456</b>    | 177.9109 | 0.0158  | 0.9              | 164.8443 | 0.2464   | 0.6203           | 141.6614 | 0.2181  | 0.6412           | 164.895  | 3.8108   | 0.0526           | 165.7823 | 1.4207  | 0.235            |
| Field experiment | Year                     | 1     | 1  | 8.771347 | 1.3042   | 0.2837           | 8.668043 | 6.5528  | <b>0.0316</b>    | 6.759651 | 19.498   | <b>0.0034</b>    | 10.87008 | 17.5488 | <b>0.0016</b>    | 7.319996 | 1.4692   | 0.2631           | 11.20526 | 10.0528 | <b>0.0087</b>    |
|                  | Season                   | 3     | 3  | 60.42261 | 37.3266  | <b>&lt;.0001</b> | 62.65499 | 3.7071  | <b>0.0161</b>    | 54.18357 | 32.275   | <b>&lt;.0001</b> | 67.06398 | 22.5069 | <b>&lt;.0001</b> | 60.34684 | 33.0496  | <b>&lt;.0001</b> | 67.03468 | 2.593   | 0.0598           |
|                  | Year*Season              | 3     | 3  | 58.10745 | 0.6582   | 0.5811           | 62.81913 | 0.1912  | 0.902            | 51.7036  | 0.6301   | 0.5989           | 66.60178 | 7.1387  | <b>0.0003</b>    | 58.23686 | 0.4052   | 0.7498           | 66.68935 | 11.5998 | <b>&lt;.0001</b> |
|                  | <b>Sex</b>               | 1     | 1  | 9.207492 | 14.9649  | <b>0.0036</b>    | 9.478226 | 0.7439  | 0.4097           | 9.595824 | 8.7921   | <b>0.0148</b>    | 19.44317 | 0.4933  | 0.4908           | 9.555839 | 16.6427  | <b>0.0024</b>    | 19.05156 | 5.5455  | <b>0.0294</b>    |
|                  | <b>Year*Sex</b>          | 1     | 1  | 8.866391 | 0.953    | 0.3548           | 9.003602 | 2.6053  | 0.1409           | 6.807996 | 13.1773  | <b>0.0088</b>    | 11.33803 | 0.5033  | 0.4924           | 7.366055 | 1.5911   | 0.2456           | 12.00417 | 0.0279  | 0.8701           |
|                  | <b>Sex*Season</b>        | 3     | 3  | 64.67598 | 0.6784   | 0.5685           | 64.76949 | 1.0657  | 0.3699           | 59.76142 | 2.6851   | 0.0546           | 69.97256 | 1.461   | 0.2327           | 64.62396 | 0.3528   | 0.7873           | 71.24763 | 3.0998  | <b>0.0321</b>    |
|                  | Needle age               | 1     | 1  | 87.32078 | 14.1385  | <b>0.0003</b>    | 86.51623 | 0.133   | 0.7163           | 88.32233 | 23.7731  | <b>&lt;.0001</b> | 85.79162 | 0.5181  | 0.4736           | 80.03641 | 13.8394  | <b>0.0004</b>    | 82.47081 | 65.4908 | <b>&lt;.0001</b> |
|                  | Year*Needle age          | 1     | 1  | 87.32078 | 1.4521   | 0.2314           | 86.51623 | 2.925   | 0.0908           | 88.32233 | 0.153    | 0.6966           | 85.76931 | 4.457   | <b>0.0377</b>    | 80.03628 | 1.3928   | 0.2414           | 82.45931 | 14.2603 | <b>0.0003</b>    |
|                  | <b>Sex*Needle age</b>    | 1     | 1  | 87.81363 | 1.1974   | 0.2768           | 89.2926  | 0.0025  | 0.9599           | 88.49471 | 0.9065   | 0.3436           | 86.28601 | 0.1194  | 0.7305           | 80.21324 | 0.4459   | 0.5062           | 82.60958 | 5.3872  | <b>0.0228</b>    |
|                  | Needle age*Season        | 3     | 3  | 87.30555 | 0.5181   | 0.671            | 86.52537 | 0.1258  | 0.9446           | 88.30122 | 1.6789   | 0.1773           | 85.71173 | 5.6484  | 0.0014           | 79.9079  | 0.3715   | 0.7738           | 82.45876 | 3.6334  | <b>0.0162</b>    |
