# Supplementary material for: Defence Is a Priority in Female Juveniles and Adults of Taxus baccata L.
Source: MDPI journal article supplement (doi:10.3390/f12070844), 2021-06-26
Supplement: s1 [file s1 › forests-1184206-supplementary- Figures.pdf]

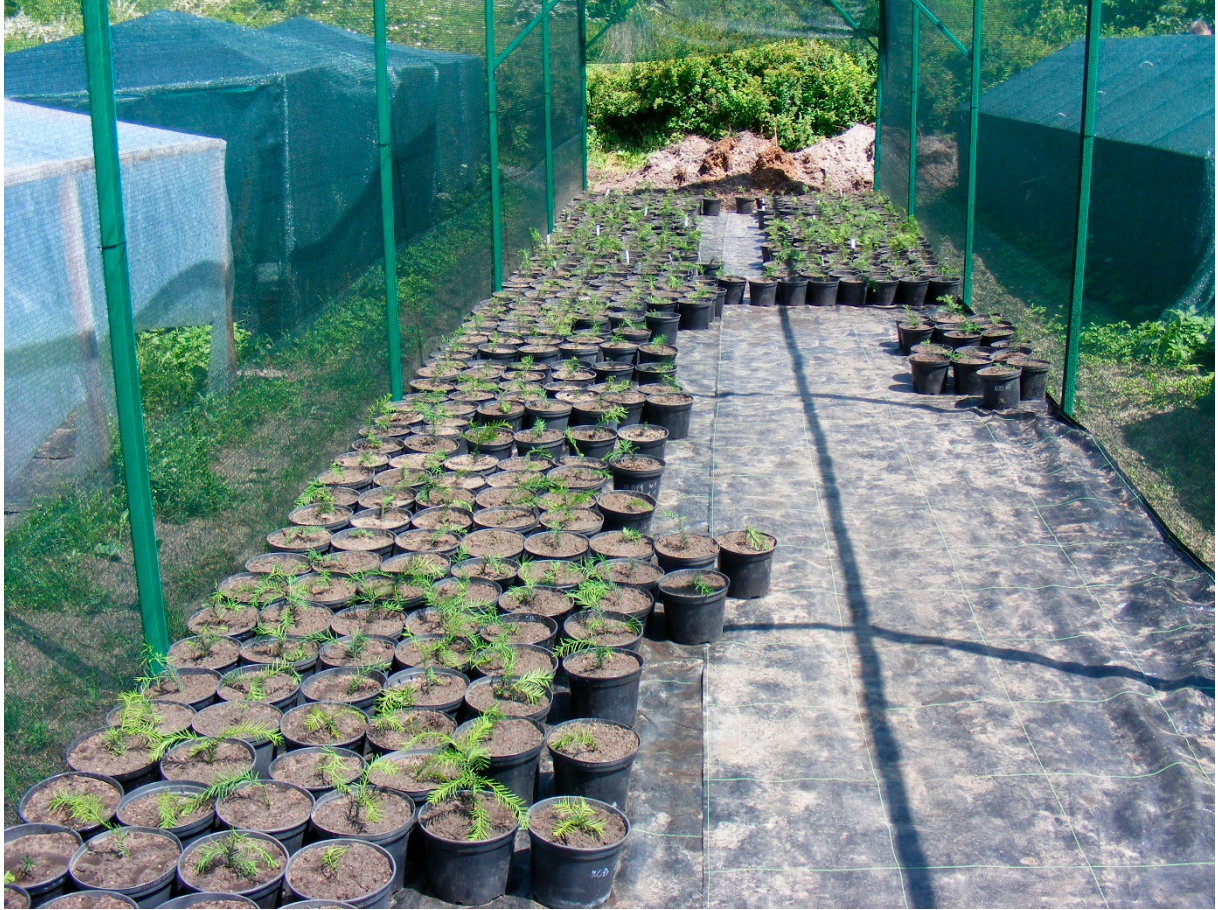

Figure S1. Photo of *Taxus baccata* (L.) cuttings in pot experiment in 2013.

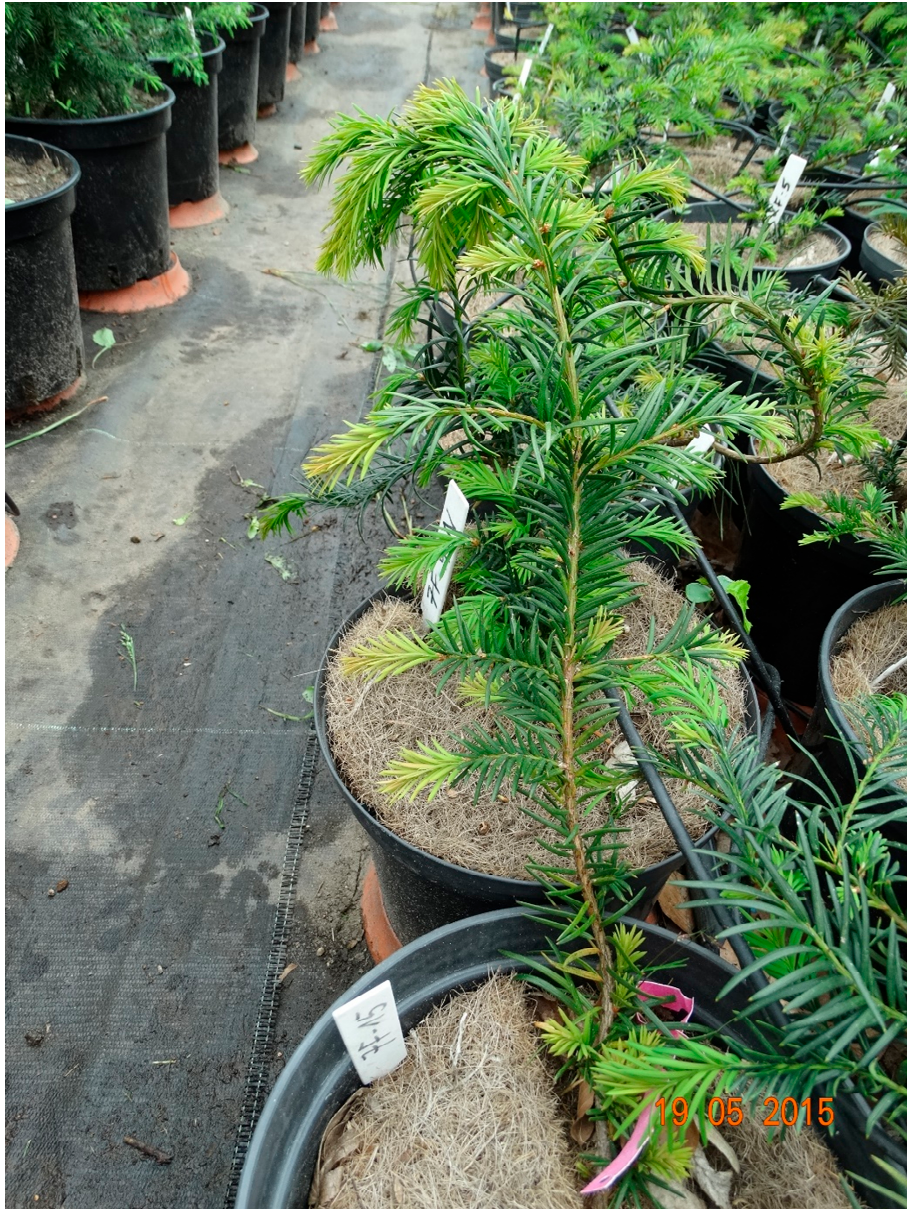

Figure S2. Photo of *Taxus baccata* (L.) cuttings in pot experiment in 2015
